# Supplementary material for: The Efficacy of Self-Management Strategies for Females with Endometriosis: a Systematic Review
Source: PubMed Central journal article supplement (PMC9988721; doi:10.1007/s43032-022-00952-9), 2022-04-29
Supplement: 43032_2022_952_MOESM2_ESM.pdf [file 43032_2022_952_MOESM2_ESM.pdf]

Supplementary file 2: Excluded full-text articles

| Citation      | Title                                                                                                                                                           | Reason for exclusion     |
|---------------|-----------------------------------------------------------------------------------------------------------------------------------------------------------------|--------------------------|
| Borghini 2018 | Relationship between nickel allergic contact mucositis and nickel-rich diet in symptomatic women suffering from endometriosis                                   | Wrong publication type   |
|               | Using a Herbal Remedy Extract for the Treatment of Endometriosis Symptoms                                                                                       | Wrong publication type   |
|               | The effect of garlic tablet on the endometriosis related pain in women                                                                                          | Wrong publication type   |
|               | Flexofytol® for the Treatment of Endometriosis- Associated Pain                                                                                                 | Wrong publication type   |
|               | Iyengar Yoga Therapy for Dysmenorrhea and Endometriosis                                                                                                         | Wrong publication type   |
| Nodler 2018   | Supplementation in adolescent girls with endometriosis (SAGE): a double blind, randomized, placebo-controlled trial                                             | Wrong publication type   |
|               | Effect of Aspirin On treatment of endometriosis                                                                                                                 | Wrong publication type   |
| Nodler 2018   | Supplementation in adolescent girls with endometriosis (SAGE): a double blind, randomized, placebo controlled trial                                             | Wrong publication type   |
| Farshi 2020   | Effect of self-care counselling on depression and anxiety in women with endometriosis: a randomized controlled trial                                            | Wrong intervention       |
| DeLeo 2019    | Role of a natural integrator based on lipoic acid, palmitoiletanolamide and myrrh in the treatment of chronic pelvic pain and endometriosis                     | Wrong patient population |
| Marziali 2015 | Role of Gluten-Free Diet in the Management of Chronic Pelvic Pain of Deep Infiltrating Endometriosis                                                            | Wrong publication type   |
| Haines 2005   | Treatment of endometriosis with acupuncture and other complementary therapies                                                                                   | Wrong publication type   |
| Gomez 2013    | Acupuncture and other complementary therapies in endometriosis                                                                                                  | Wrong publication type   |
| Tian 2004     | Observation on curative effect on treating endometriosis with Xiao Yi Fang                                                                                      | Could not access         |
|               | Chinese herbs in the treatment of laparoscopy diagnosed endometriosis: a controlled study                                                                       | Wrong publication type   |
| Hansen 2017   | Long-term effects of mindfulness-based psychological intervention for coping with pain in endometriosis: A six-year follow-up on a pilot study                  | Wrong patient population |
|               | Effect of Mediterranean Diet and Physical Activity in Patients With Endometriosis                                                                               | Wrong publication type   |
| Nodler 2018   | Supplementation in adolescent girls with endometriosis (SAGE): A double blind, randomized, placebo-controlled trial                                             | Wrong publication type   |
|               | The effect of sensate focus technique and position changing on sexual function in women with pelvic endometriosis                                               | Wrong publication type   |
|               | Electrotherapy in the treatment of pain during intercourse and assessment of the outcomes on the quality of life and sexuality of women with deep endometriosis | Wrong publication type   |

The efficacy of self-management strategies for females with endometriosis: a systematic review  
 Reproductive Sciences

Supplementary file 2: Excluded full-text articles

|              |                                                                                                                                                                                    |                        |
|--------------|------------------------------------------------------------------------------------------------------------------------------------------------------------------------------------|------------------------|
| Sesti 2009   | Recurrence rate of endometrioma after laparoscopic cystectomy: a comparative randomized trial between post-operative hormonal suppression treatment or dietary therapy vs. placebo | Wrong outcome measures |
| Ferrero 2011 | Letrozole and norethisterone acetate versus letrozole and triptorelin in the treatment of endometriosis related pain symptoms: A randomized controlled trial                       | Wrong intervention     |
| Mira 2015    | Effectiveness of complementary pain treatment for women with deep endometriosis through Transcutaneous Electrical Nerve Stimulation (TENS): randomized controlled trial            | Other                  |
| Wilson 2020  | Understanding the role of Facebook to support women with endometriosis: A Malaysian perspective                                                                                    | Wrong study design     |
| Zhao 2013    | Controlling the recurrence of pelvic endometriosis after a conservative operation: comparison between Chinese herbal medicine and western medicine                                 | Wrong intervention     |
| Han 2021     | Medical intelligent processor system and traditional Chinese medicine to treat endometriosis                                                                                       | Wrong publication type |
| Bi 2018      | Effect of neuromuscular electrical stimulation for endometriosis-Associated pain                                                                                                   | Wrong intervention     |
| Music 2005   | Endometriosis and self-management strategies                                                                                                                                       | Wrong publication type |
|              | Comparing between prescription and not prescription of vitamin D on recurrence of endometriosis related pains                                                                      | Wrong publication type |
|              | The impact of vitamins and antioxidants on the severity of endometriosis, pelvic pain in women                                                                                     | Wrong publication type |
|              | TENS effect and exercises in menstrual pain                                                                                                                                        | Wrong publication type |
|              | Efficacy of Trace Elements in the Treatment of Endometriosis: a Pilot Study                                                                                                        | Wrong publication type |
|              | TENS Self-applied in the Complementary Treatment of Deep Endometriosis                                                                                                             | Wrong publication type |
| Tuncer 2019  | Effects on health and diet quality of the gluten free diet                                                                                                                         | Wrong publication type |
|              | Effect of oral administration of N- acetyl cysteine in Women with Endometriosis                                                                                                    | Wrong publication type |
|              | Dietary Treatment of Endometriosis-related Irritable Bowel Syndrome                                                                                                                | Wrong publication type |
| Cao 2008     | Treatment of Pelvic Pain Caused by Endometriosis with Xuejie Huayu Zhitong Fang                                                                                                    | Could not access       |
|              | Yoga in the management of pain and related stress on women with Endometriosis                                                                                                      | Wrong publication type |
|              | Evaluating the influence of Yoga, Cognitive Behaviour Therapy and Standard Care on Quality of Life and Healthcare Costs in Endometriosis                                           | Wrong publication type |
|              | DLBS1442 for The Treatment of Pain in Patients Suspected Endometriosis                                                                                                             | Wrong publication type |
|              | The effect of garlic tablets on the pain of women with endometriosis                                                                                                               | Wrong publication type |
|              | The effect of vitamin D supplementation in treatment of endometriosis                                                                                                              | Wrong publication type |
| Liang 2014   | Influence on dysmenorrhea of Bushen Tiaojing Huoxue decoction combined with enema in treatment of endometriosis                                                                    | Could not access       |
|              | A multicentre, randomised, double-blind, placebo-controlled clinical trial to evaluate the use of Chinese herbal medicine in the management of endometriosis: a prospective study  | Wrong publication type |

The efficacy of self-management strategies for females with endometriosis: a systematic review  
Reproductive Sciences

Supplementary file 2: Excluded full-text articles

|                 |                                                                                                                                                                            |                          |
|-----------------|----------------------------------------------------------------------------------------------------------------------------------------------------------------------------|--------------------------|
| Yin 2016        | Treating 49 cases of endometriosis with laparoscopy in combination with chinese medicine                                                                                   | Could not access         |
| Behboodi        | Effect of garlic on dysmenorrhea in women with endometriosis                                                                                                               | Could not access         |
| Moghadam 2016   | A clinical study of Luo's Nei Yi Fang for Endometriosis                                                                                                                    | Could not access         |
| Luo 1996        | Multi-center Clinical Trials of Sanjie Analgesic Capsule in Treating Endometriosis                                                                                         | Wrong publication type   |
|                 | The effect of isoflavones in endometriotic pain                                                                                                                            | Wrong publication type   |
| Behboodi        | Effect of garlic on dysmenorrhea in women with endometriosis                                                                                                               | Wrong publication type   |
| Moghadam 2016   | A Clinical Trial to Test a Modified Traditional Chinese Herbal Medicine for the Treatment of Endometriosis                                                                 | Wrong publication type   |
| Hernandez 2012  | Effects of Diet, Exercise, and Weight on Endometriosis Pain Reduction                                                                                                      | Wrong publication type   |
| Ferrero 2010    | Norethisterone acetate in the treatment of colorectal endometriosis: A pilot study                                                                                         | Wrong intervention       |
| Sesti 2009      | Postoperative dietary supplementation with omega-3 fatty acids and antioxidants after conservative surgery for symptomatic endometriosis                                   | Wrong publication type   |
| Arndt 2007      | Alternative therapy options for endometriosis                                                                                                                              | Not English              |
| Santanam 2013   | Antioxidant supplementation reduces endometriosis-related pelvic pain in humans                                                                                            | Wrong patient population |
| Santanam 2013   | Antioxidant supplementation reduces endometriosis-related pelvic pain in humans                                                                                            | Wrong patient population |
| Lo Monte 2013   | [Administration of MICRONIZED PALMITOYLETHANOLAMIDE (PEA)-transpolydatin in the treatment of chronic pelvic pain in women affected by endometriosis: preliminary results.] | Not English              |
| Ernst 2013      | Chinese herbs against endometriosis?                                                                                                                                       | Not English              |
| Kuhlmann 2019   | Chinese Medicine for Endometriosis, Dysmenorrhea and Fibroids                                                                                                              | Not English              |
| Kavtaradze 2003 | Vitamin E and C supplementation reduces endometriosis related pelvic pain                                                                                                  | Wrong publication type   |
| Antoniadis 2020 | Influence of mindfulness-based Stress Reduction on Patients with Endometriosis in a randomized Cohort Study                                                                | Not English              |
| Borghini 2020   | Irritable Bowel Syndrome-Like Disorders in Endometriosis: Prevalence of Nickel Sensitivity and Effects of a Low-Nickel Diet. An Open-Label Pilot Study                     | Wrong patient population |
| Flower 2011     | A feasibility study exploring the role of Chinese herbal medicine in the treatment of endometriosis                                                                        | Wrong intervention       |
| Fisher 2018     | Cyclic Perimenstrual Pain and Discomfort and Australian Women's Associated Use of Complementary and Alternative Medicine: A Longitudinal Study                             | Wrong patient population |
| Sesti 2011      | Nutritional regimen and antioxidants in the treatment of symptomatic pelvic endometriosis                                                                                  | Wrong publication type   |
|                 | Endometriosis in Patients With Irritable Bowel Syndrome: Specific Symptomatic and Demographic Profile, and Response to the Low FODMAP Diet                                 | Wrong patient population |

Mardon AK, Leake HB, Hayles C, Henry M, Neumann T, Moseley GL, Chalmers KJ  
Corresponding author: k.jane.chalmers@gmail.com

The efficacy of self-management strategies for females with endometriosis: a systematic review  
 Reproductive Sciences

Supplementary file 2: Excluded full-text articles

|                  |                                                                                                                                                                                 |                          |
|------------------|---------------------------------------------------------------------------------------------------------------------------------------------------------------------------------|--------------------------|
| Mills 2011       | A conundrum: Wheat and gluten avoidance and its implication with endometriosis patients                                                                                         | Wrong publication type   |
| Indraccolo 2010  | Effect of palmitoylethanolamide-polydatin combination on chronic pelvic pain associated with endometriosis: Preliminary observations                                            | Wrong patient population |
|                  | A randomized controlled trial for Yi-Sheng Xiao-Zheng granules in the treatment of dysmenorrhea caused by pelvic endometriosis (syndrome of kidney deficiency and blood stasis) | Could not access         |
| Weng 2015        | Chinese medicinal plants for advanced endometriosis after conservative surgery: a prospective, multi-center and controlled trial                                                | Wrong outcome measures   |
| Lorenz 2016      | Transcutaneous electrical nerve stimulation in deep infiltrating endometriosis                                                                                                  | Not English              |
| Cobellis 2004    | The treatment with a COX-2 specific inhibitor is effective in the management of pain related to endometriosis                                                                   | Wrong intervention       |
| Zhang 2017       | Jing Tong Yu Shu, a traditional Chinese medicine, suppresses IL-1 $\beta$ and IL-6 gene expressions in macrophages, and alleviates endometriosis                                | Wrong study design       |
| Mesrine 2013     | Re: "Dairy-food, calcium, magnesium, and vitamin D intake and endometriosis: a prospective cohort study"                                                                        | Wrong publication type   |
| Hansen 2015      | Long-time effects of mindfulness-based psychological treatment on chronic pain and quality of life in endometriosis                                                             | Wrong publication type   |
| Yang 2006        | Comparative study on the efficacy of Yiweining and Gestrinone for post-operational treatment of stage III endometriosis                                                         | Wrong intervention       |
| Baek 2020        | Vitamin D and endometriosis: Is there a correlation with disease severity?                                                                                                      | Wrong publication type   |
| Shoebbotham 2016 | Therapeutic affordances of online support group use in women with endometriosis                                                                                                 | Wrong patient population |
| Nodler 2020      | Supplementation with vitamin D or omega-3 fatty acids in adolescent girls and young women with endometriosis (SAGE): a double-blind, randomized, placebo-controlled trial       | Other                    |
| Kiesel 1989      | Treatment of endometriosis                                                                                                                                                      | Not English              |
| Giugliano 2013   | The adjuvant use of N-palmitoylethanolamine and transpolydatin in the treatment of endometriotic pain                                                                           | Wrong patient population |
| Korell 2011      | Endometriosis and Diet                                                                                                                                                          | Not English              |
| Kold 2012        | Mindfulness-based psychological intervention for coping with pain in endometriosis                                                                                              | Wrong intervention       |
| Kold 2016        | Mindfulness-based psychological intervention for coping with pain in endometriosis (vol 64, pg 2, 2012)                                                                         | Wrong intervention       |
| Lo Monte 2013    | [Administration of micronized palmitoylethanolamide (PEA)-transpolydatin in the treatment of chronic pelvic pain in women affected by endometriosis: preliminary results]       | Not English              |

The efficacy of self-management strategies for females with endometriosis: a systematic review  
Reproductive Sciences

Supplementary file 2: Excluded full-text articles

|                      |                                                                                                                                                                          |                          |
|----------------------|--------------------------------------------------------------------------------------------------------------------------------------------------------------------------|--------------------------|
| Lete 2018            | Effectiveness of an antioxidant preparation with N-acetyl cysteine, alpha lipoic acid and bromelain in the treatment of endometriosis-associated pelvic pain: LEAP study | Wrong patient population |
|                      | Corrigendum Mindfulness-based psychological intervention for coping with pain in endometriosis (Nordic Psychology, 64, (2012), (2-16), DOI:10.1080/19012276.2012.693727) | Wrong publication type   |
| Jankovich 2017       | The low FODMAP diet reduced symptoms in a patient with endometriosis and IBS                                                                                             | Wrong outcome measures   |
| Hawkins 2003         | The Use of Thermal Biofeedback in the Treatment of Pain Associated with Endometriosis: Preliminary Findings                                                              | Wrong patient population |
| Zhao 2013            | Chinese medicine improves postoperative quality of life in endometriosis patients: a randomized controlled trial                                                         | Wrong intervention       |
| Swarnakar 2007       | chroniCurcumin arrests endometriosis by downregulation of matrix metalloproteinase-9 activity                                                                            | Wrong study design       |
| Mehdizadehkashi 2021 | The effect of vitamin D supplementation on clinical symptoms and metabolic profiles in patients with endometriosis                                                       | Wrong patient population |
|                      | Mindfulness Meditation for Chronic Pelvic Pain Management                                                                                                                | Wrong patient population |
| Awad 2017            | Efficacy of exercise on pelvic pain and posture associated with endometriosis: within subject design                                                                     | Wrong intervention       |
| Carpenter 1995       | The effect of regular exercise on women receiving danazol for treatment of endometriosis                                                                                 | Wrong outcome measures   |
