# Supplementary material for: The Efficacy of Self-Management Strategies for Females with Endometriosis: a Systematic Review
Source: PubMed Central journal article supplement (PMC9988721; doi:10.1007/s43032-022-00952-9), 2022-04-29
Supplement: 43032_2022_952_MOESM3_ESM.pdf [file 43032_2022_952_MOESM3_ESM.pdf]

## Supplementary file 3: Study raw data

| Study                        | Comparison                                     | RoB | Dysmenorrhoea                |                         |                         | Non-menstrual pelvic pain    |                         |                         | Dyspareunia                  |                         |                         | Overall pain                 |                         |                         |
|------------------------------|------------------------------------------------|-----|------------------------------|-------------------------|-------------------------|------------------------------|-------------------------|-------------------------|------------------------------|-------------------------|-------------------------|------------------------------|-------------------------|-------------------------|
|                              |                                                |     | Intervention<br>mean (SD); n | Control<br>mean (SD); n | SMD<br>[95% CI]         | Intervention<br>mean (SD); n | Control<br>mean (SD); n | SMD<br>[95% CI]         | Intervention<br>mean (SD); n | Control<br>mean (SD); n | SMD<br>[95% CI]         | Intervention<br>mean (SD); n | Control<br>mean (SD); n | SMD<br>[95% CI]         |
| <b>Dietary supplements</b>   |                                                |     |                              |                         |                         |                              |                         |                         |                              |                         |                         |                              |                         |                         |
| Almassinokiani 2016          | Vitamin D vs Placebo (End of intervention)     |     | 2.1 (2.33); 19               | 2.73 (2.84); 19         | -0.24<br>[-0.88, 0.40]  | 0.84 (1.74); 19              | 0.68 (1.7); 19          | 0.09<br>[-0.55, 0.73]   |                              |                         |                         |                              |                         |                         |
| Khodaverdi 2019              | Lactobacillus vs Placebo (End of intervention) |     | 3.07 (2.34); 16              | 4.47 (2.13); 16         | -0.58<br>[-1.29, 0.13]  | 2 (1.93); 16                 | 2.5 (2.34); 16          | -0.23<br>[-0.92, 0.47]  | 2.55 (2.77); 16              | 3.25 (2.3); 16          | -0.27<br>[-0.96, 0.43]  |                              |                         |                         |
|                              | Lactobacillus vs Placebo (Short term)          |     | 3.8 (2.54); 16               | 4.6 (1.92); 16          | -0.35<br>[-1.05, 0.35]  | 3 (2.39); 16                 | 2.44 (2.13); 16         | 0.24<br>[-0.45, 0.94]   | 3.09 (2.54); 16              | 3.17 (2.08); 16         | -0.03<br>[-0.73, 0.66]  |                              |                         |                         |
| Kohama 2007                  | Pycnogenol vs GnRHa (End of intervention)      |     | 2.2 (0.59); 24               | 2.3 (0.66); 20          | -0.16<br>[-0.75, 0.44]  | 2.1 (0.63); 23               | 2.5 (0.89); 20          | -0.52<br>[-1.13, 0.09]  |                              |                         |                         |                              |                         |                         |
| Maia 2012                    | Resveratrol vs OC (End of intervention)        |     | 0.2 (0.4); 12                | 2.1 (0.5); 12           | -4.05<br>[-5.54, -2.56] |                              |                         |                         |                              |                         |                         |                              |                         |                         |
| Nodler 2020                  | Vitamin D vs Placebo (End of intervention)     |     |                              |                         |                         |                              |                         |                         |                              |                         | 5.5 (3.2); 23           |                              | 0.34<br>[-0.27, 0.95]   |                         |
|                              | Fish oil vs Placebo (End of intervention)      |     |                              |                         |                         |                              |                         |                         |                              |                         | 5.2 (3.3); 17           | 4.4 (3.1); 19                | 0.24<br>[-0.41, 0.90]   |                         |
| Schwertner 2013              | Melatonin vs Placebo (End of intervention)     |     | 4.24 (2.61); 20              | 6.84 (2.38); 20         | -1.02<br>[-1.68, -0.36] |                              |                         |                         | 4.68 (2.61); 20              | 6.08 (1.42); 20         | -0.65<br>[-1.29, -0.02] | 2.78 (1.35); 20              | 4.58 (4.58); 20         | -1.25<br>[-1.94, -0.57] |
| <b>Dietary modifications</b> |                                                |     |                              |                         |                         |                              |                         |                         |                              |                         |                         |                              |                         |                         |
| Sesti 2007                   | Diet therapy vs Placebo (Intermediate)         |     |                              | 6.4 (1.3); 110          | 0<br>[-0.38, 0.38]      |                              | 6.2 (0.9); 110          | -1.57<br>[-1.99, -1.15] |                              | 4.8 (1.2); 110          | 0.17<br>[-0.21, 0.55]   |                              |                         |                         |
|                              | Diet therapy vs Gn-RHa (Intermediate)          |     | 6.4 (1); 35                  | 5.9 (0.9); 39           | 0.52<br>[0.06, 0.99]    | 4.7 (1.1); 35                | 5 (1.1); 39             | -0.27<br>[-0.73, 0.19]  | 5 (1.1); 35                  | 4.3 (1.2); 39           | 0.6<br>[0.13, 1.07]     |                              |                         |                         |
|                              | Diet therapy vs OC (Intermediate)              |     |                              | 5.5 (1.2); 38           | 0.8<br>[0.32, 1.28]     |                              | 5 (0.8); 38             | -0.31<br>[-0.77, 0.15]  |                              | 4.5 (1.3); 38           | 0.52<br>[0.05, 0.98]    |                              |                         |                         |
| <b>Exercise</b>              |                                                |     |                              |                         |                         |                              |                         |                         |                              |                         |                         |                              |                         |                         |
| Goncalves 2016               | Yoga vs No yoga (End of intervention)          |     |                              |                         |                         |                              |                         |                         |                              |                         |                         | 3.5 (3); 15                  | 6.5 (2.9) 8             | -0.97<br>[-1.89, -0.06] |

**Effect size calculations**

CI, confidence interval; GnRHa, gonadotropin-releasing hormone agonist; OC, oral contraceptive; RoB, risk of bias; SD, standard deviation; SMD, standardised mean difference
